# Supplementary material for: Small heat shock proteins determine synapse number and neuronal activity during development
Source: PubMed Central journal article supplement (PMC7241713; doi:10.1371/journal.pone.0233231), 2020-05-21

## ORIGINAL IMAGES FOR BLOTS AND GELS

**Original file Figure 2. Original file Fig 2G Immunoprecipitation HSP23 and HSP26.** Figure 2G in the article is based on 1 to 4 lanes from the original file. HSP23 is marked in red colour and HSP26 in green.

**Supplementary Figure 3. Original file Fig 3D Immunoprecipitation HSP23 and HSP26 in *pkm* RNAi context.** Figure 3D in the article is based on 1 to 10 lanes from the original file respect to HSP23 signal. HSP23 is marked in red.

**Supplementary Figure 4. Original file Fig 4B Western blot HSP23 and HSp26 in *pkm* RNAi context.** Figure 4B in the article is based on 2 and 3 lanes from the original file respect to HSP23 and HSP26 signal. HSP23 is marked in red colour and HSP26 in green.

**Same gel with longer exposure time “Original file Figure 4 exposition 2”**

# Original file Figure 2

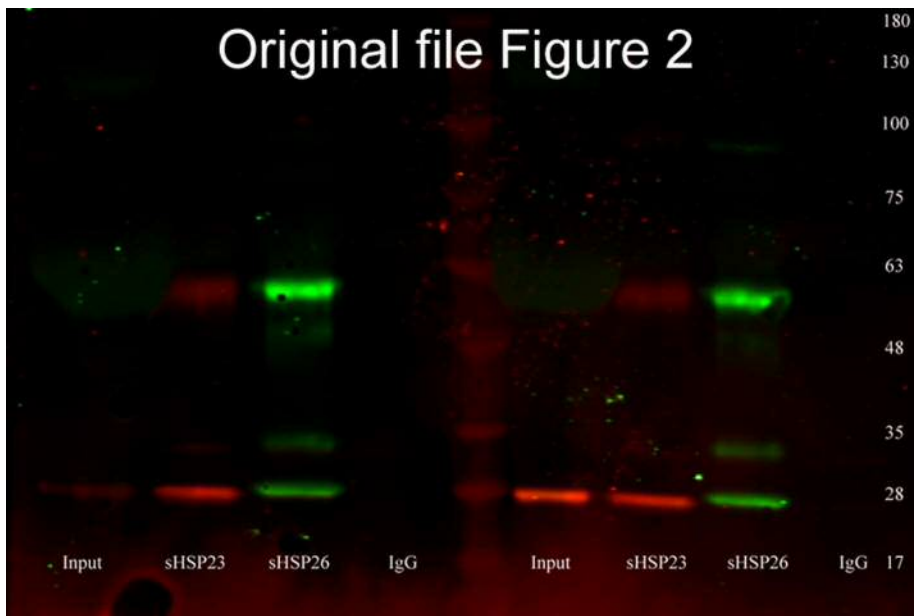

# Original file Figure 3

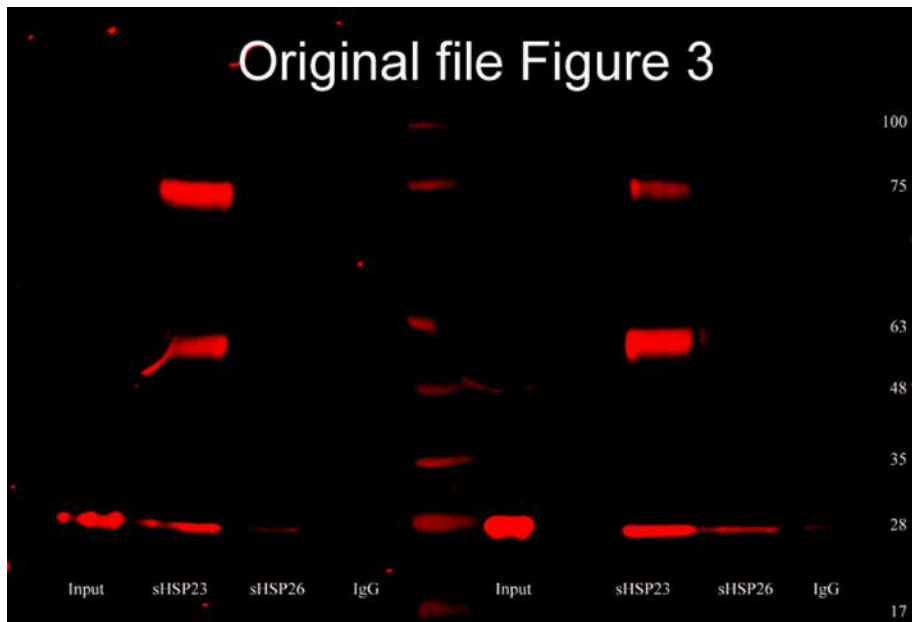



Original File Figure 4 exposition 2

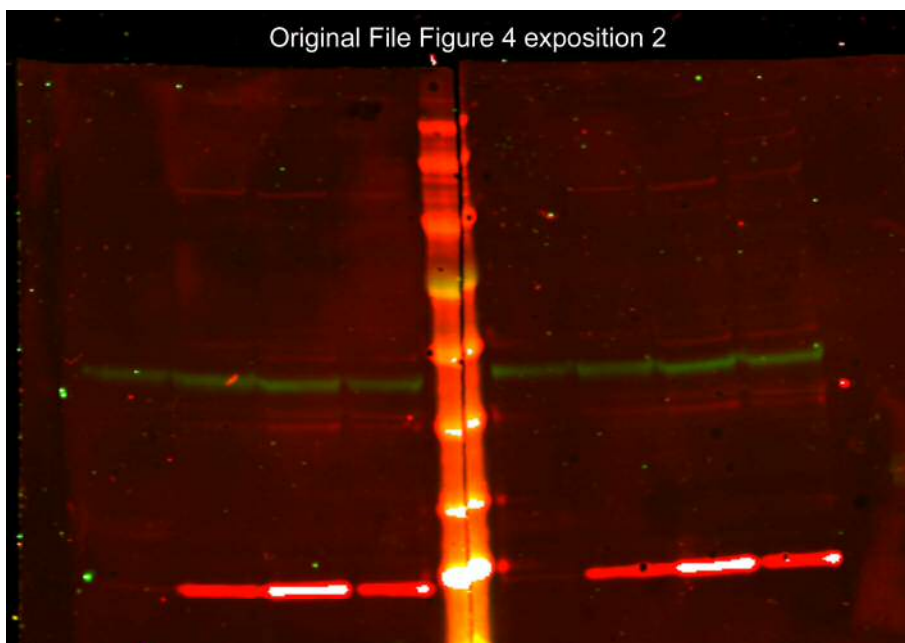

Supplement: pone.0233231.s002.pdf [file pone.0233231.s002.pdf]
